# Supplementary material for: Dual purpose S-trityl-linkers for glycoarray fabrication on both polystyrene and gold
Source: Royal Society of Chemistry journal article supplement (doi:10.1039/c2ob26118a), 2012-01-01
Supplement: c2ob26118a.pdf [file c2ob26118a.pdf]

## **Supporting Information**

### **Dual purpose *S*-trityl-linkers for glycoarray fabrication on both polystyrene and gold**

**Johannes W. Wehner,<sup>a</sup> Martin J. Weissenborn,<sup>b</sup> Mirja Hartmann,<sup>a</sup> Christopher J. Gray,<sup>b</sup> Robert Šardžik,<sup>b</sup> Claire E. Eyers,<sup>b</sup> Sabine L. Flitsch<sup>\*b</sup> and Thisbe K. Lindhorst<sup>\*a</sup>**

Address: <sup>1</sup> Otto Diels Institute of Organic Chemistry, Christiana Albertina University of Kiel, Otto-Hahn-Platz 3/4, 24098 Kiel, Germany.

<sup>2</sup> School of Chemistry, University of Manchester, Manchester Interdisciplinary Biocentre, 131 Princess Street, Manchester, M17DN, United Kingdom.

E-mail:

Prof. Thisbe K. Lindhorst\*: tkind@oc.uni-kiel.de

Prof. Sabine L. Flitsch\*: sabine.flitsch@manchester.ac.uk

\* Corresponding authors

| <b>Table of contents</b>                                                                                                           | <b>page</b> |
|------------------------------------------------------------------------------------------------------------------------------------|-------------|
| <b>1 Analytical data of tested compounds</b>                                                                                       | <b>S3</b>   |
| 1.1 <i>N</i> -(Acetyl)- <i>S</i> -(triphenylmethyl)- <i>L</i> -cysteine-[2-( $\alpha$ -D-mannopyranosyloxy)ethyl]amide (5)         | S3          |
| 1.2 2-(11-Tritylsulphanyl-undecanoyl)aminoethyl $\alpha$ -D-mannopyranoside (6)                                                    | S5          |
| 1.3 <i>N</i> -(Acetyl)- <i>S</i> -(triphenylmethyl)- <i>L</i> -cysteine-[6-( $\alpha$ -D-mannopyranosyloxy)-3-thiahexyl]amide (10) | S7          |
| 1.4 6-(10-Tritylsulphanyl-undecanoyl)amino-4-thiahexyl $\alpha$ -D-mannopyranoside (11)                                            | S9          |
| 1.5 <i>In situ S</i> -deprotection of compounds 5, 6, 10 and 11                                                                    | S10         |
| 1.6 2-(11-Sulphhydryl-undecanoyl)aminoethyl $\alpha$ -D-mannopyranoside (6-SH)                                                     | S11         |
| <b>2 Glycoarrays on gold</b>                                                                                                       | <b>S12</b>  |
| 2.1 Gold chip functionalisation                                                                                                    | S12         |
| 2.1.1 Coupling of <i>in situ</i> deprotected thiols to unmodified gold surface                                                     | S12         |
| 2.1.2 Coupling of <i>in situ</i> deprotected thiols to maleimide-terminated gold surface                                           | S12         |
| 2.2 MALDI-ToF MS analysis of SAMs on gold                                                                                          | S12         |
| 2.2.1 SAM formation on gold surface using <i>in situ</i> deprotected thiols                                                        | S13         |
| 2.2.2 SAM formation using maleimide-terminated thiols SAMs                                                                         | S16         |
| 2.2.3 Thiol coupling to maleimide-terminated SAMs                                                                                  | S18         |
| <b>3 Glycoarrays on polystyrene</b>                                                                                                | <b>S22</b>  |
| 3.1 Material, media and buffer solutions                                                                                           | S22         |
| 3.2 Blocking studies                                                                                                               | S22         |
| 3.3 Solvent studies                                                                                                                | S24         |
| 3.4 Binding studies                                                                                                                | S25         |
| 3.5 Comparison of bacterial adhesion to glycoarrays made with <i>S</i> -tritylated cysteinyl mannosides 5 and 10                   | S27         |
| 3.6 Phenol-sulphuric acid assay                                                                                                    | S28         |
| <b>4 References</b>                                                                                                                | <b>S28</b>  |

## 1. Analytical data of tested compounds

Analytical HPLC was performed on a Merck Hitachi LaChrom L-7000 series apparatus with a LiChrospher 100 RP-8 (5  $\mu$ m, Merck) column.  $^1\text{H}$  and  $^{13}\text{C}$  NMR spectra were recorded using a Bruker DRX-500 or a Bruker AV-600 spectrometer. NMR spectra were calibrated with respect to the solvent peak (in case of  $\text{CDCl}_3$  the reference was tetramethylsilane (TMS)). 2D NMR techniques (COSY, HSQC, HMBC) were used for full assignment of the spectra.

### 1.1 *N*-(Acetyl)-*S*-(triphenylmethyl)-*L*-cysteine-[2-( $\alpha$ -D-mannopyranosyloxy)ethyl]amide (**5**)

Synthesis and analytical data were in accordance with the literature.<sup>[1]</sup>

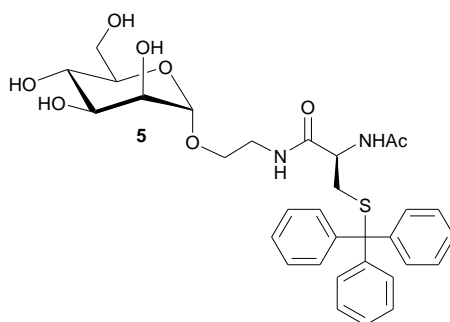

HPLC  $t_R$  = 2.59 min (A = water, B = methanol, A: 20 %, 10 min, 1.2 mL/min);

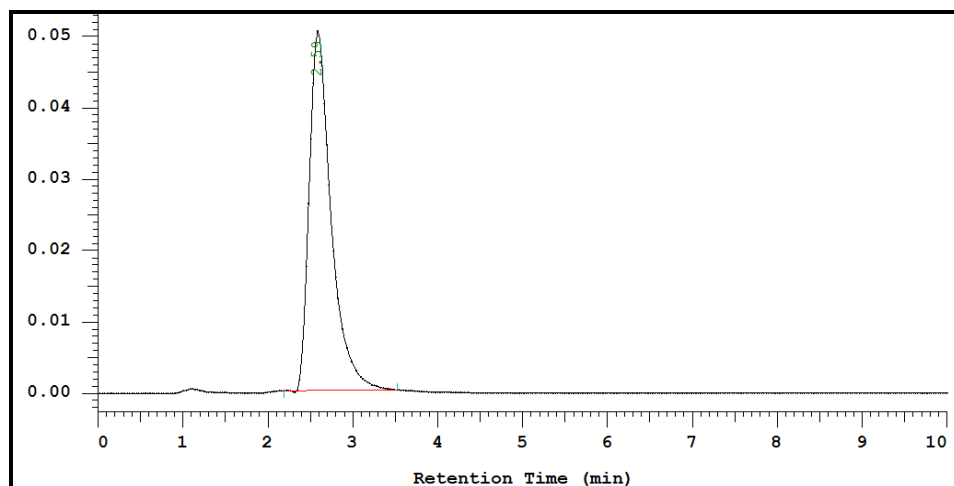

**Figure S1:** HPLC chromatogram of compound **5** (integrated chromatogram 240-271 nm).

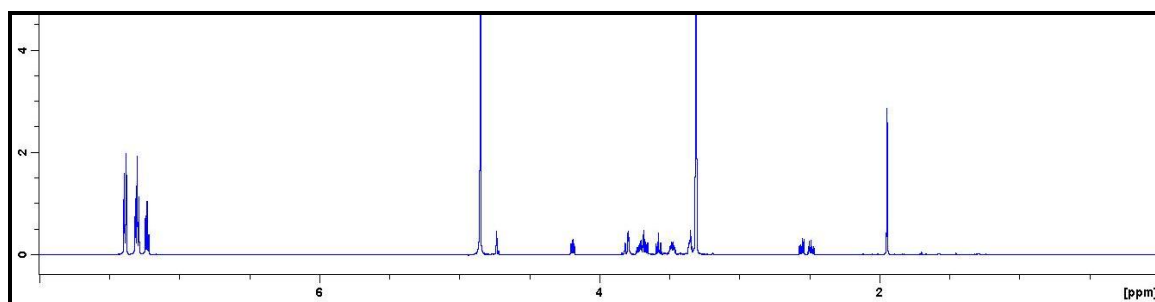

**Figure S2:** <sup>1</sup>H NMR spectrum (600 MHz, CD<sub>3</sub>OD) of compound **5**.

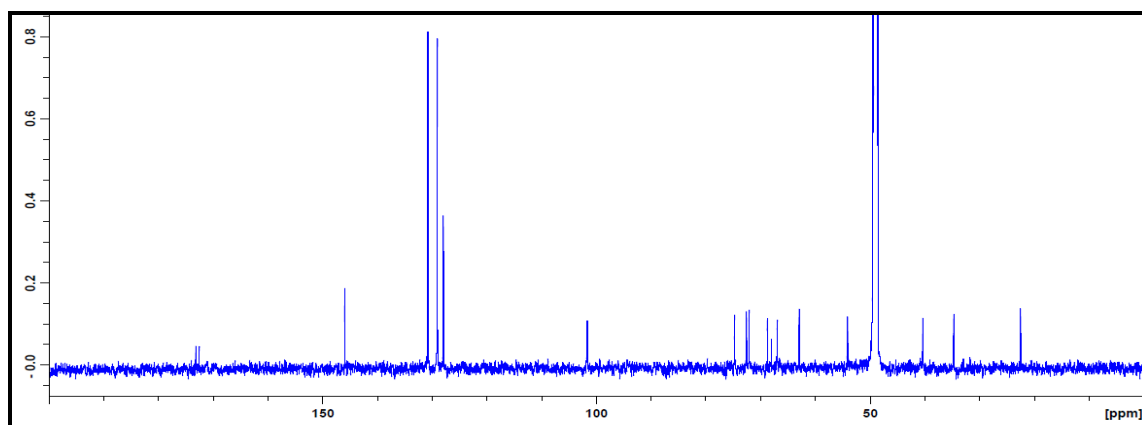

**Figure S3:** <sup>13</sup>C NMR spectrum (150 MHz, CD<sub>3</sub>OD) of compound **5**.

## 1.2 2-(11-Tritylsulphanyl-undecanoyl)aminoethyl $\alpha$ -D-mannopyranoside (**6**)

Synthesis and analytical data were in accordance with the literature.<sup>[2]</sup>

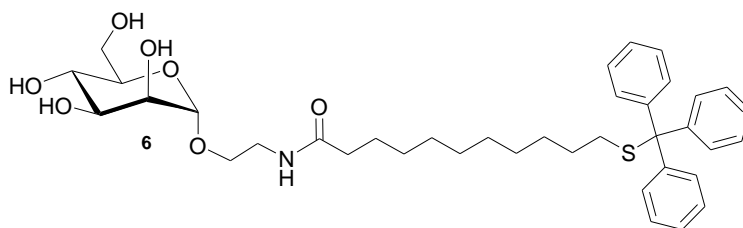

HPLC  $t_R$  = 5.49 min (A = water, B = methanol, A: 20 %, 10 min, 1.2 mL/min);

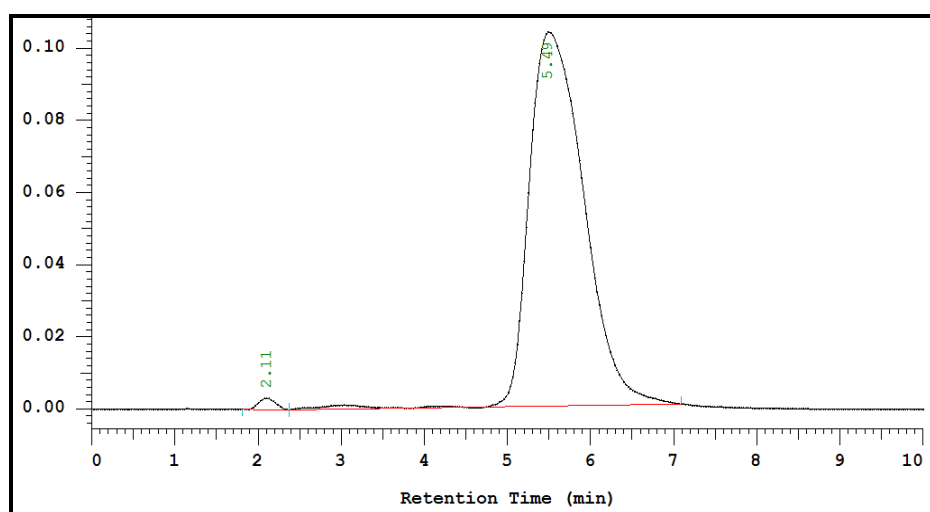

**Figure S4:** HPLC chromatogram of compound **6** (integrated chromatogram 240-271 nm).

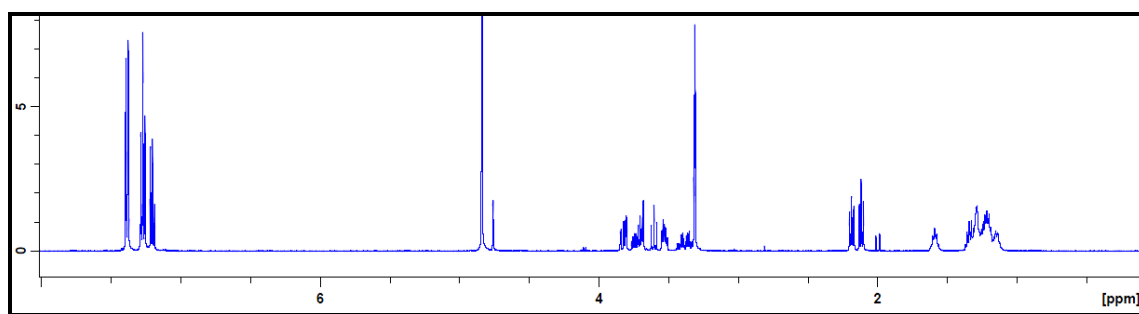

**Figure S5:**  $^1\text{H}$  NMR spectrum (500 MHz,  $\text{CD}_3\text{OD}$ ) of compound **6**.

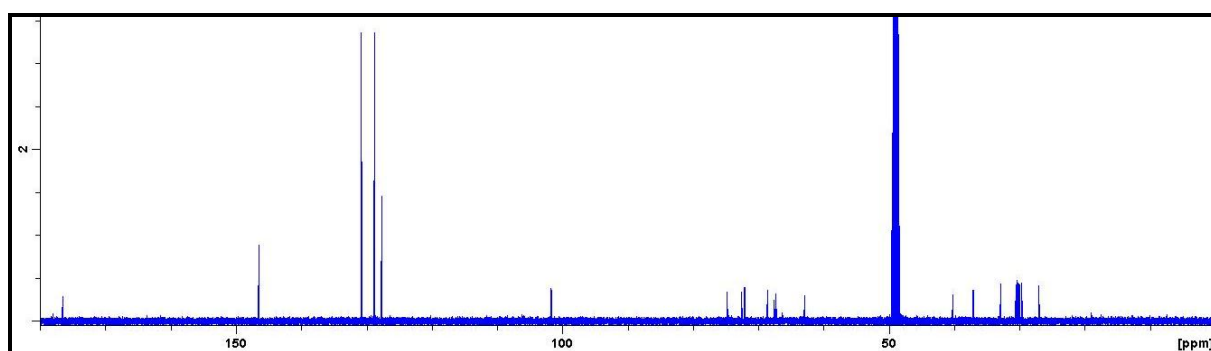

**Figure S6:**  $^{13}\text{C}$  NMR spectrum (125 MHz,  $\text{CD}_3\text{OD}$ ) of compound **6**.

**1.3 *N*-(Acetyl)-*S*-(triphenylmethyl)-*L*-cysteine-[6-( $\alpha$ -D-mannopyranosyloxy)-3-thiahexyl]amide (**10**)**

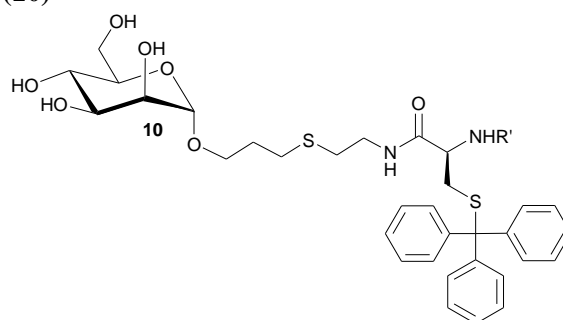

**HPLC**  $t_R$  = 2.64 min (A = water, B = methanol, A: 20 %, 10 min, 1.2 mL/min);

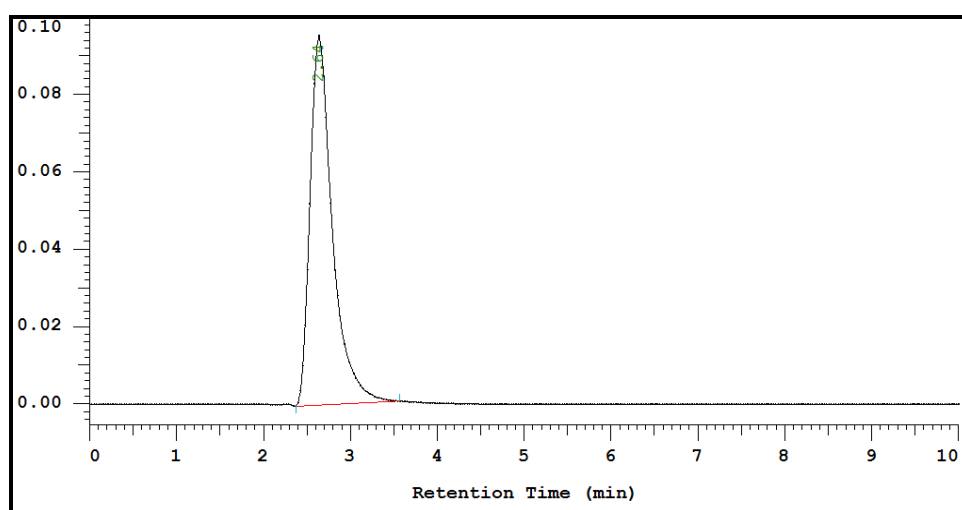

**Figure S7:** HPLC chromatogram of compound **10** (integrated chromatogram 240-271 nm).

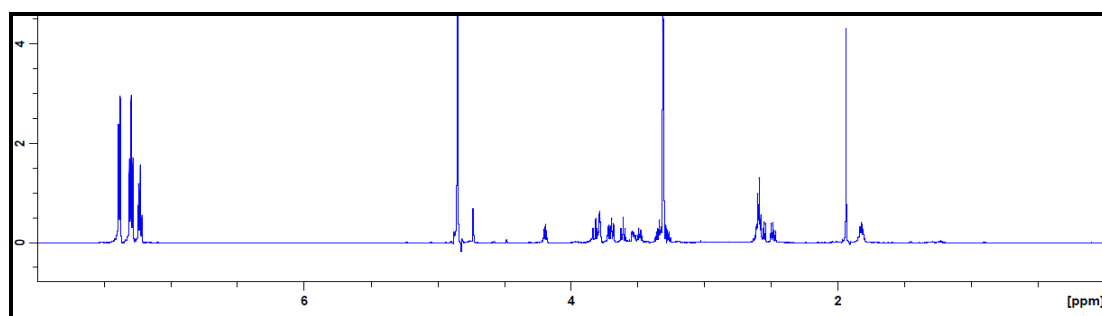

**Figure S8:**  $^1\text{H}$  NMR spectrum (600 MHz,  $\text{CD}_3\text{OD}$ ) of compound **10**.

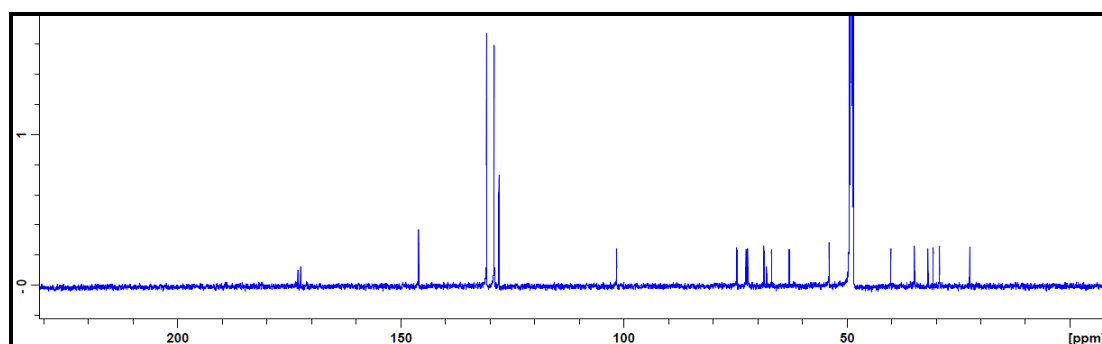

**Figure S9:**  $^{13}\text{C}$  NMR spectrum (150 MHz,  $\text{CD}_3\text{OD}$ ) of compound **10**.



**1.4 6-(10-Tritylsulphanyl-undecanoyl)amino-4-thiahexyl  $\alpha$ -D-mannopyranoside (11)**

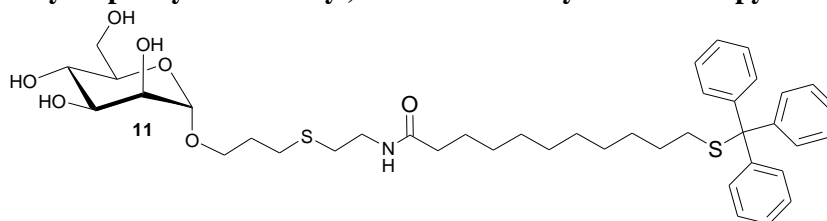

**HPLC**  $t_R$  = 6.11 min (A = water, B = methanol, A: 20 %, 10 min, 1.2 mL/min);

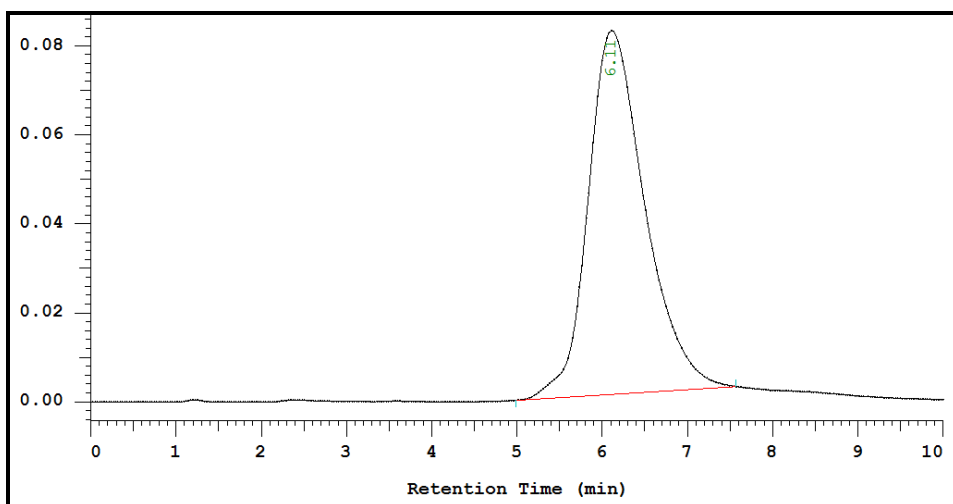

**Figure S10:** HPLC chromatogram of compound **11** (integrated chromatogram 240-271 nm).

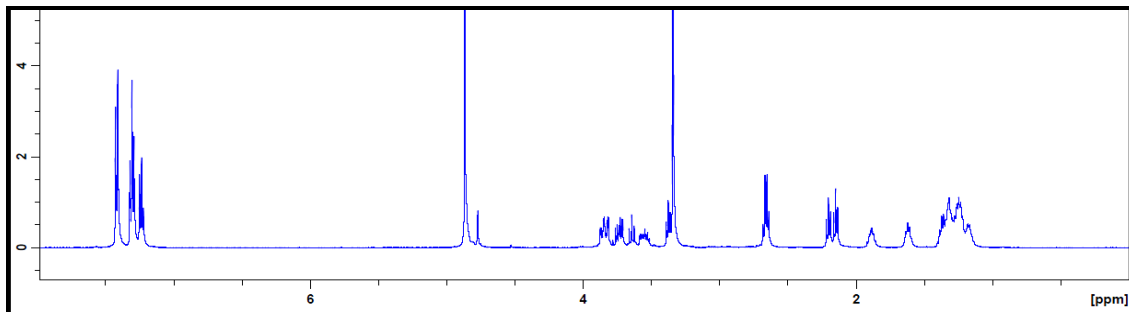

**Figure S11:**  $^1\text{H}$  NMR spectrum (500 MHz,  $\text{CD}_3\text{OD}$ ) of compound **11**.

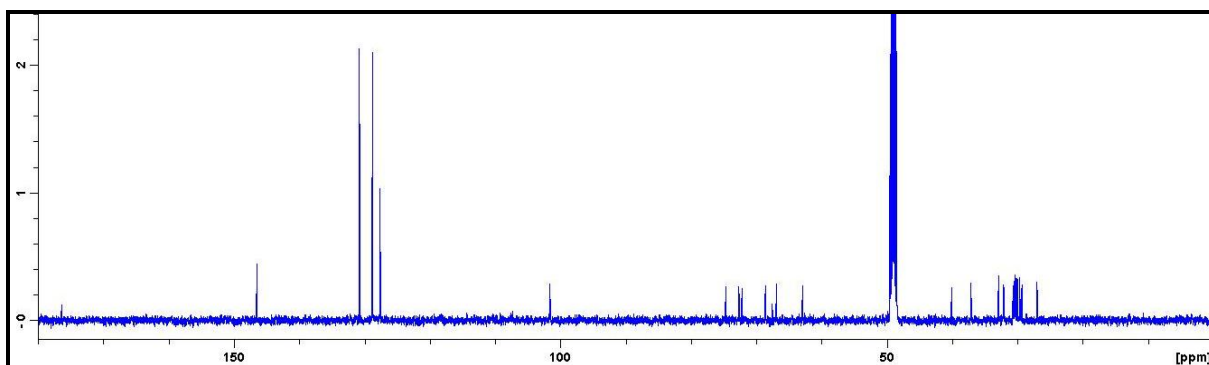

**Figure S12:**  $^{13}\text{C}$  NMR spectrum (125 MHz,  $\text{CD}_3\text{OD}$ ) of compound **11**.

### 1.5 *In situ* S-deprotection<sup>[3]</sup> of compounds **5**, **6**, **10** and **11**

S-tritylated mannosides **5**, **6**, **10** and **11** were de-tritylated, as described in the main manuscript for preparation of **6-SH**, to give the respective thiols. The latter were used for fabrication of glycoarrays on gold without purification (Scheme S1).

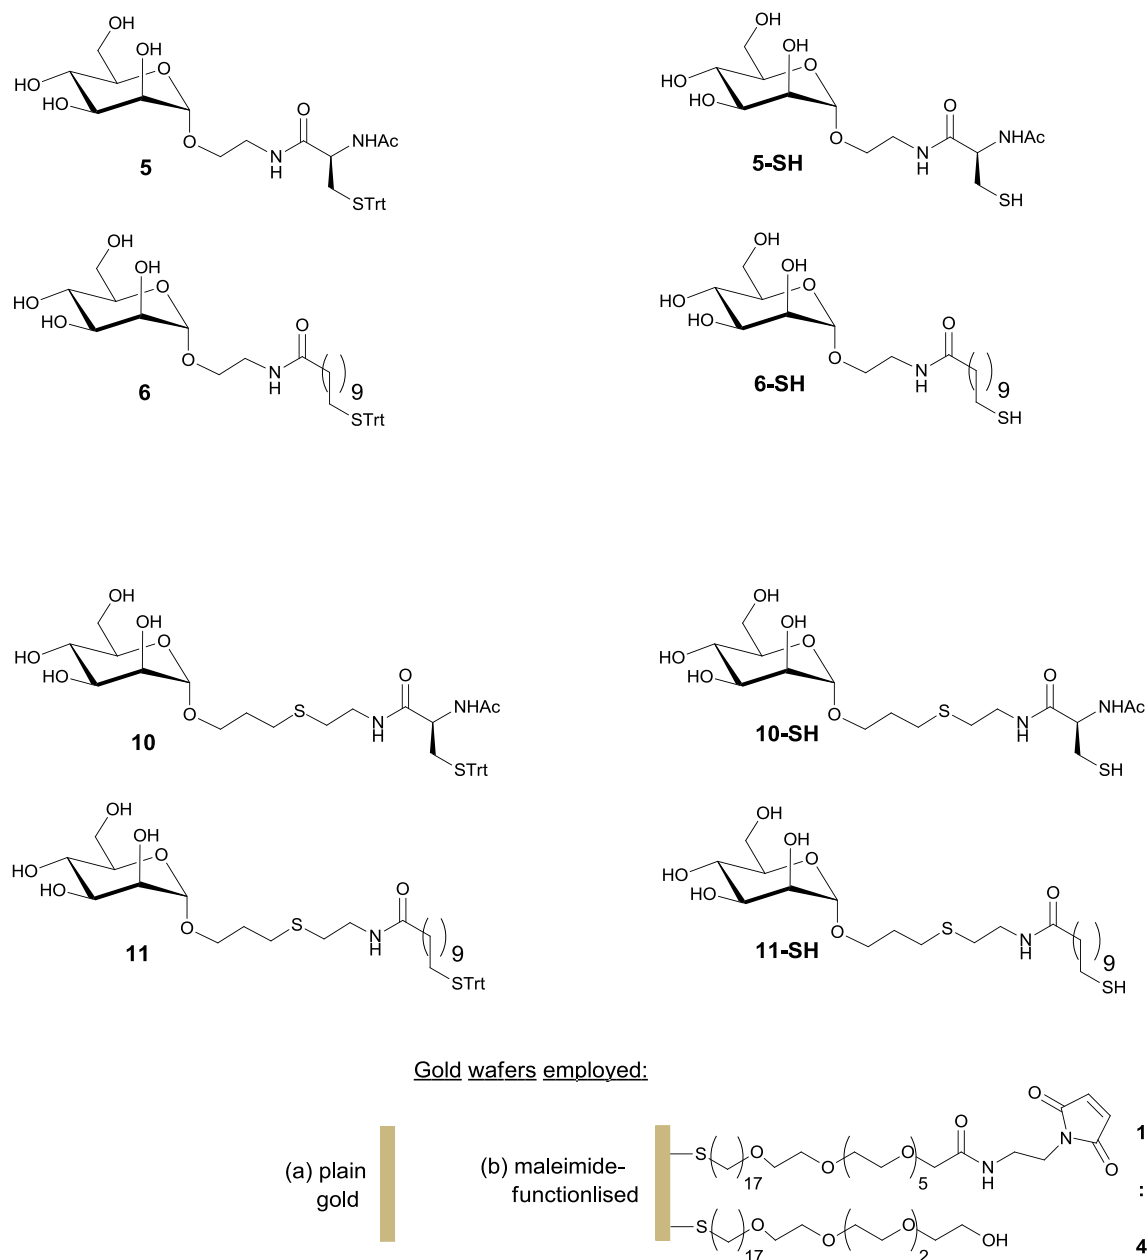

**Scheme S1:** *In situ* deprotection of S-tritylated mannosides **5**, **6**, **10** and **11** gave the respective thiols (**5-SH**, **6-SH**, **10-SH** and **11-SH**) which were applied for the functionalisation of two different types of gold wafers: (a) plain gold and (b) maleimide-terminal SAMs on gold (in a linker to spacer ratio of 1:4).

## 1.6 2-(11-Sulphhydryl-undecanoyl)aminoethyl $\alpha$ -D-mannopyranoside (6-SH)

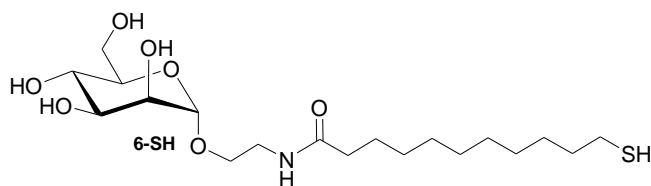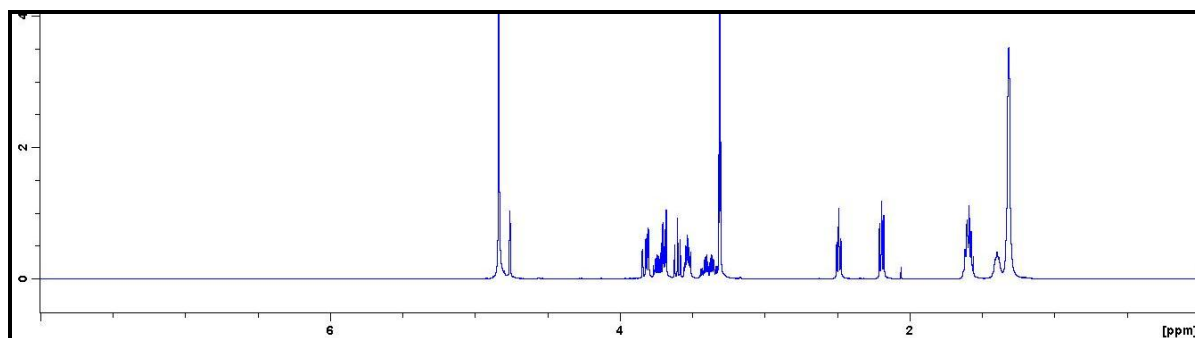

**Figure S13:**  $^1\text{H}$  NMR spectrum (500 MHz,  $\text{CD}_3\text{OD}$ ) of compound **6-SH**.

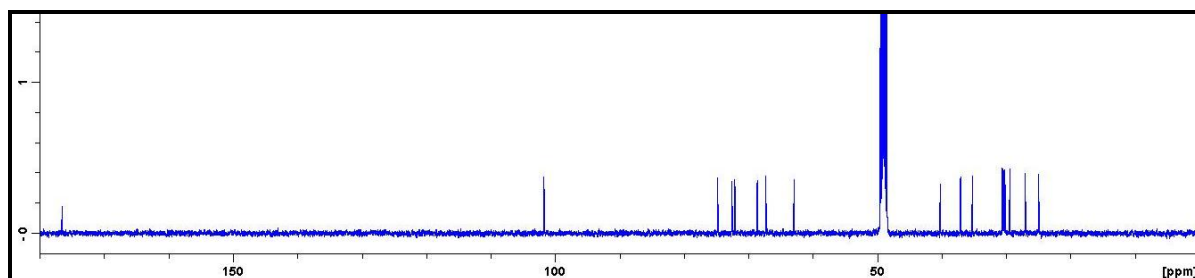

**Figure S14:**  $^{13}\text{C}$  NMR spectrum (125 MHz,  $\text{CD}_3\text{OD}$ ) of compound **6-SH**.

## 2 Glycoarrays on gold

### 2.1 Gold chip functionalisation

#### 2.1.1 Coupling of *in situ* deprotected thiols to unmodified gold surface

Thiols were directly applied to the cleaned gold chip in PBS buffer (10 mM) and left for 1.5-12 h. Afterwards, the plate was thoroughly washed with ethanol, water and dichloromethane.

#### 2.1.2 Coupling of *in situ* deprotected thiols to maleimide-terminated gold surface

The respective thiol solution (10 mM in 10 mM PBS, 1  $\mu$ L) was applied spotwise to the maleimide-functionalised SAMs, left for 1-3 h and analysed by MALDI-ToF MS.

### 2.2 MALDI-ToF MS analysis of SAMs on gold

All spectra were analysed with FlexAnalysis software (Bruker, USA) using default integration settings. Calibration was either performed before the analysis at the Ultraflex II instrument or afterwards in FlexAnalysis. Unless otherwise noted, all  $m/z$  values refer to the  $[M+Na]^+$  ion and the corresponding disulphide which is formed during ionisation.

## 2.2.1 SAM formation on gold surface using *in situ* deprotected thiols

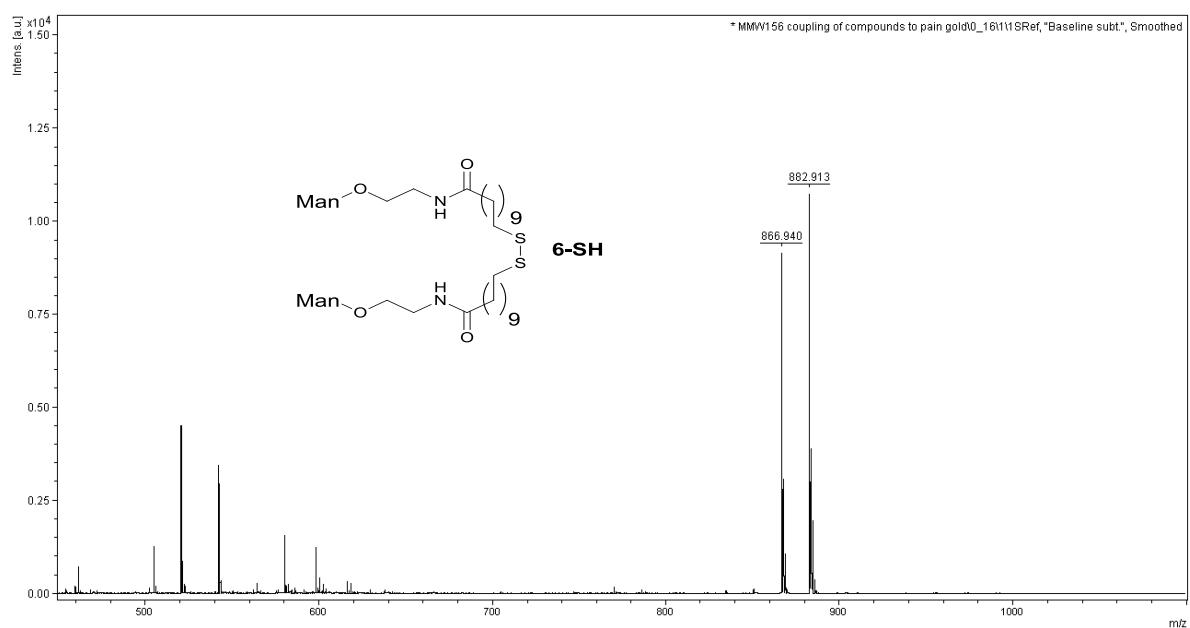

**Figure S15:** MALDI-ToF mass spectrum of gold surface modified with the purified thiol mannoside **6-SH**. The respective disulphide ( $m/z$  866.940  $[M+Na]^+$  and  $m/z$  882.913  $[M+K]^+$ ) was detected.

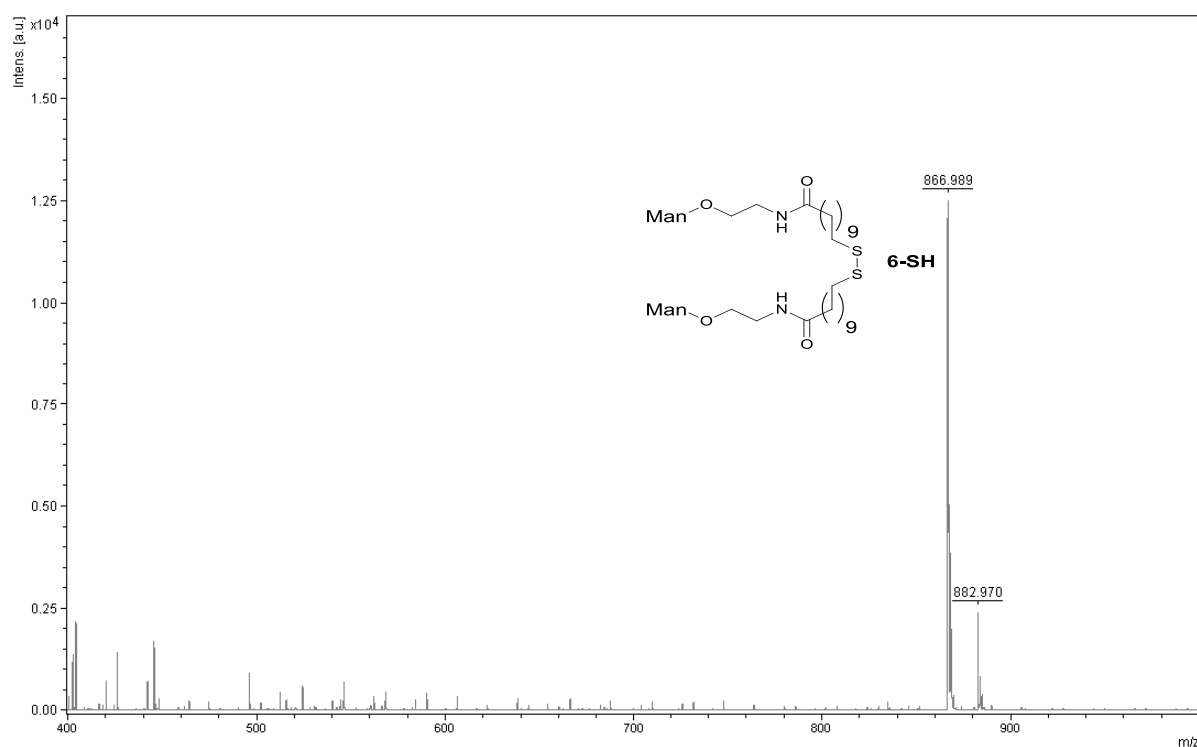

**Figure S16:** MALDI-ToF mass spectrum of gold surface modified with *in situ* deprotected mannoside **6-SH**. The obtained spectrum is in analogy to the result obtained with the purified **6-SH**. The respective disulphide ( $m/z$  866.989  $[M+Na]^+$  and  $m/z$  882.970  $[M+K]^+$ ) was detected.

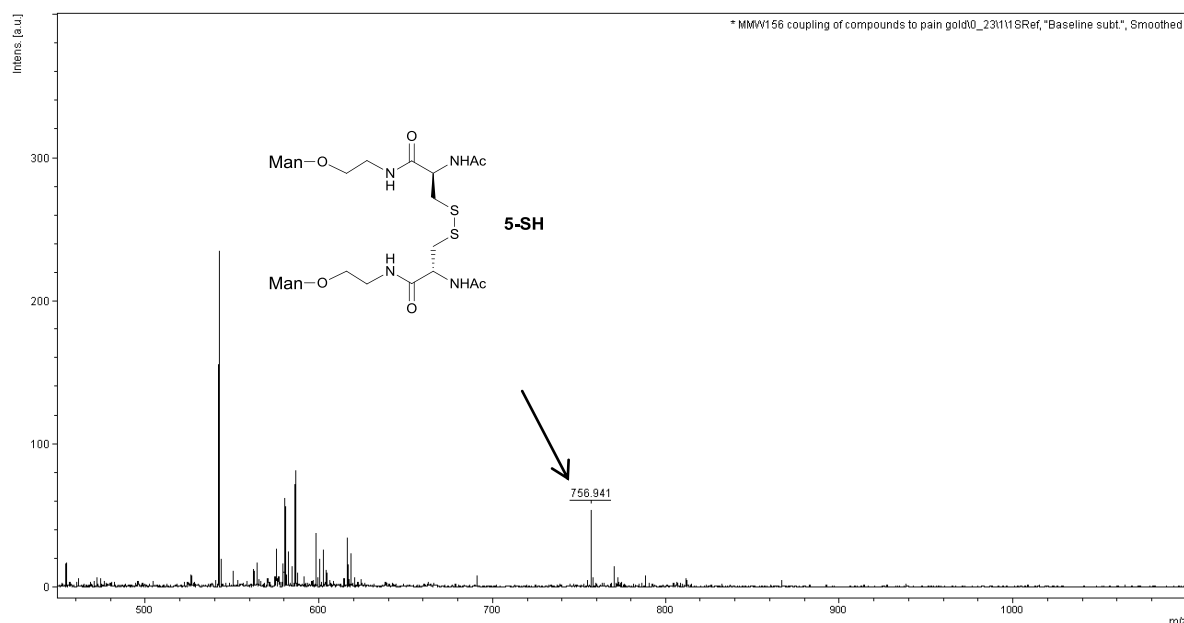

**Figure S17:** MALDI-ToF mass spectrum of gold surface modified with *in situ* deprotected mannoside **5-SH**. The respective disulphide ( $m/z$  756.941  $[M+Na]^+$ ) was detected.

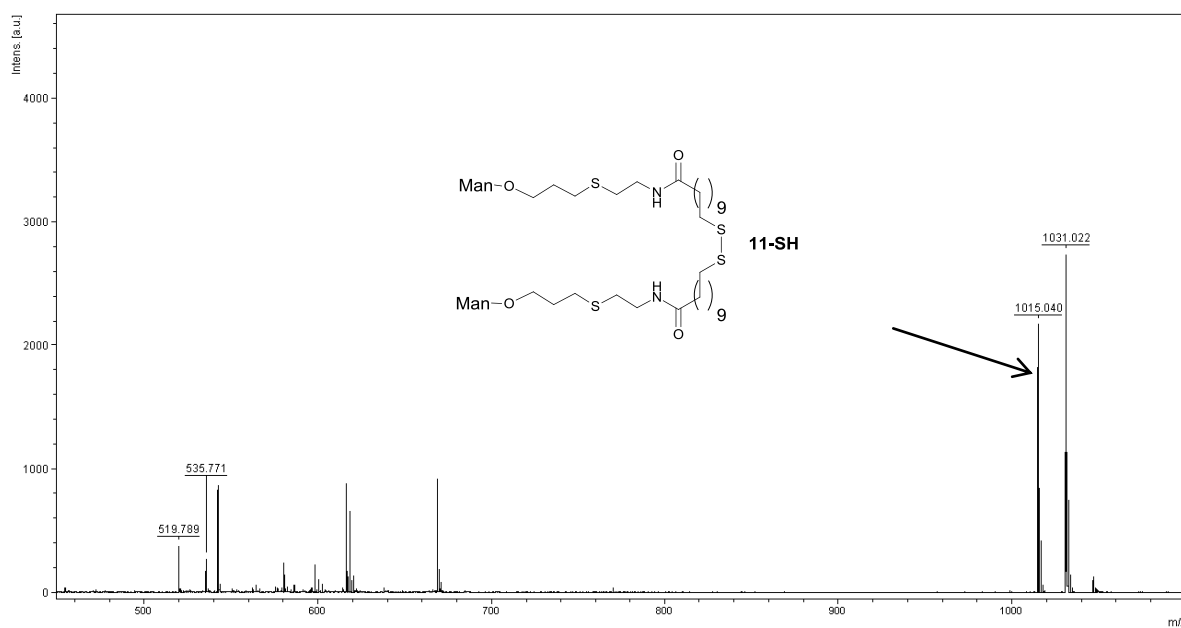

**Figure S18:** MALDI-ToF mass spectrum of gold surface modified with *in situ* deprotected mannoside **11-SH**. The respective disulphide ( $m/z$  1015.040  $[M+Na]^+$  and  $m/z$  1031.022  $[M+K]^+$ ) was detected.

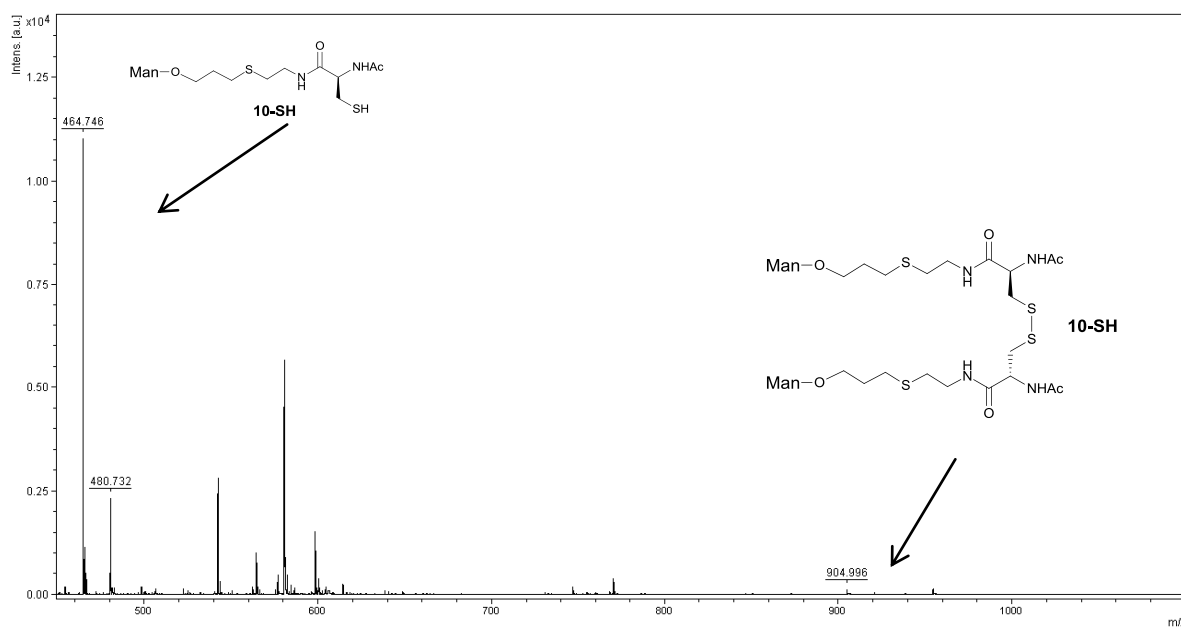

**Figure S19:** MALDI-ToF mass spectrum of gold surface modified with *in situ* deprotected mannoside **10-SH**. Thiol **10-SH** ( $m/z$  464.746  $[M+Na]^+$  and  $m/z$  480.732  $[M+K]^+$ ) and the respective disulphide ( $m/z$  904.996  $[M+Na]^+$ ) were detected.

## 2.2.2 SAM formation using maleimide-terminated thiols SAMs

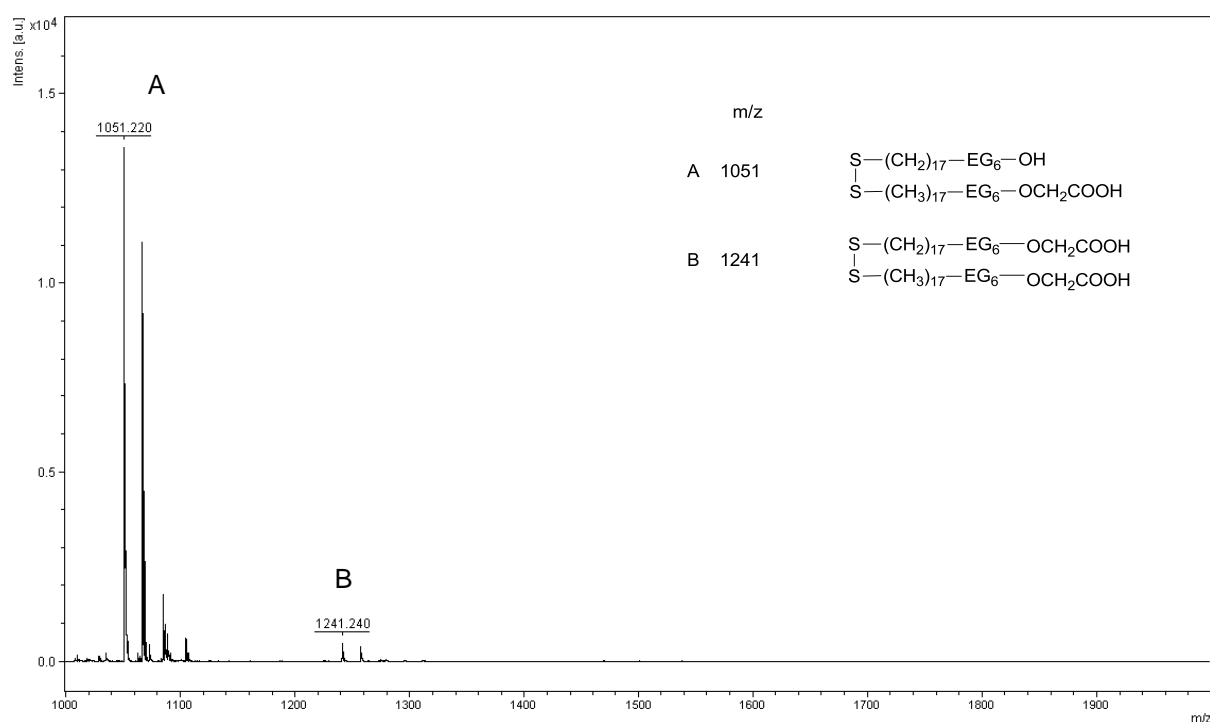

**Figure S20:** MALDI-ToF mass spectrum of gold surface modified with hydroxyl- and carboxy-terminal thiols. Analysis of the formed SAM on gold showed: **A** the mixed disulphide formed *in situ* from the hydroxyl- and carboxyl-terminal thiols ( $m/z$  1051.220) and **B** the disulphide formed *in situ* from the carboxyl-terminal spacer ( $m/z$  1241.240).



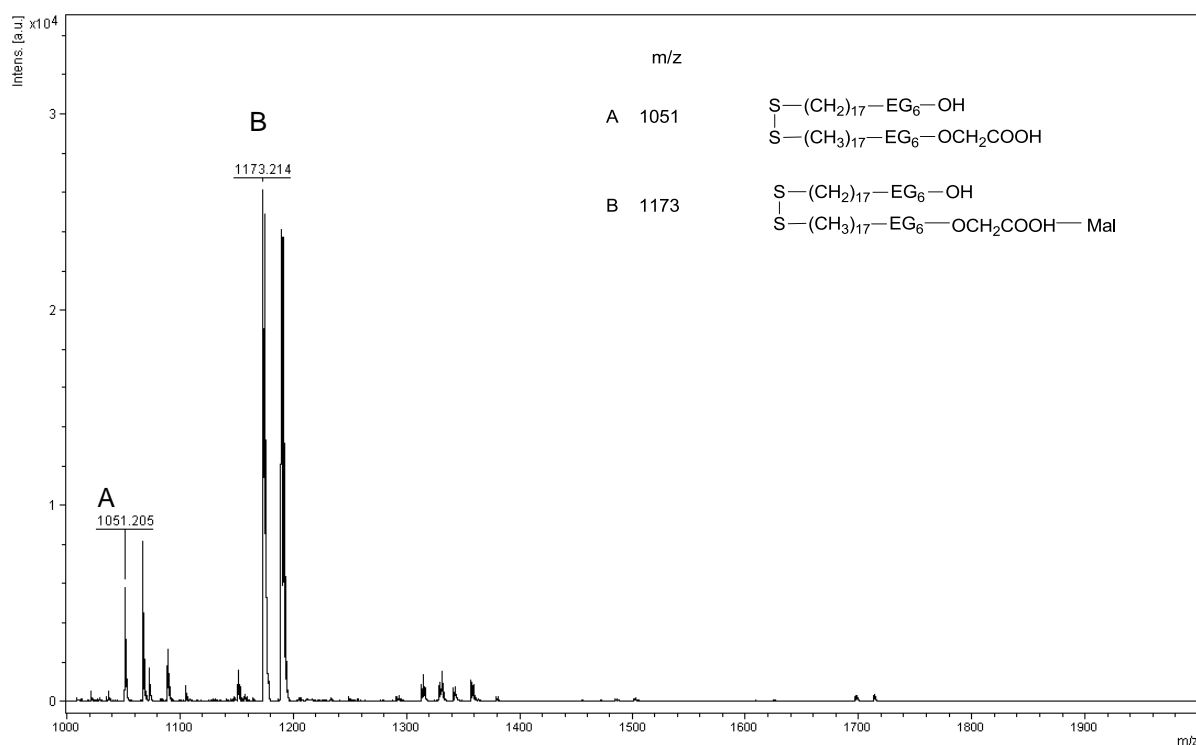

**Figure S21:** MALDI-ToF mass spectrum of gold surface modified with hydroxyl- and carboxy-terminal thiols (cf. Figure S20) after coupling of *N*-(2-aminoethyl)maleimide (Mal). Analysis of the formed SAM on gold showed: **A** the mixed disulphide formed *in situ* from the hydroxyl- and carboxyl-terminal thiols ( $m/z$  1051.205) and **B** the mixed disulphide formed *in situ* from the maleimide and the hydroxyl-terminal molecules ( $m/z$  1173.214).

### 2.2.3 Thiol coupling to maleimide-terminated SAMs

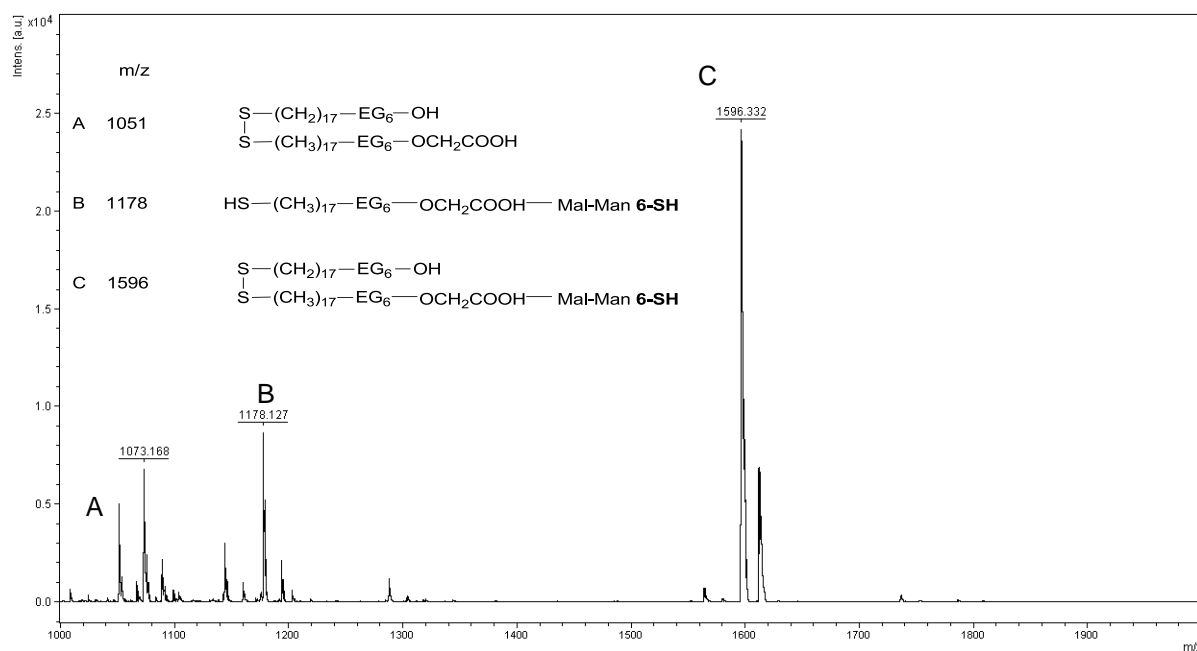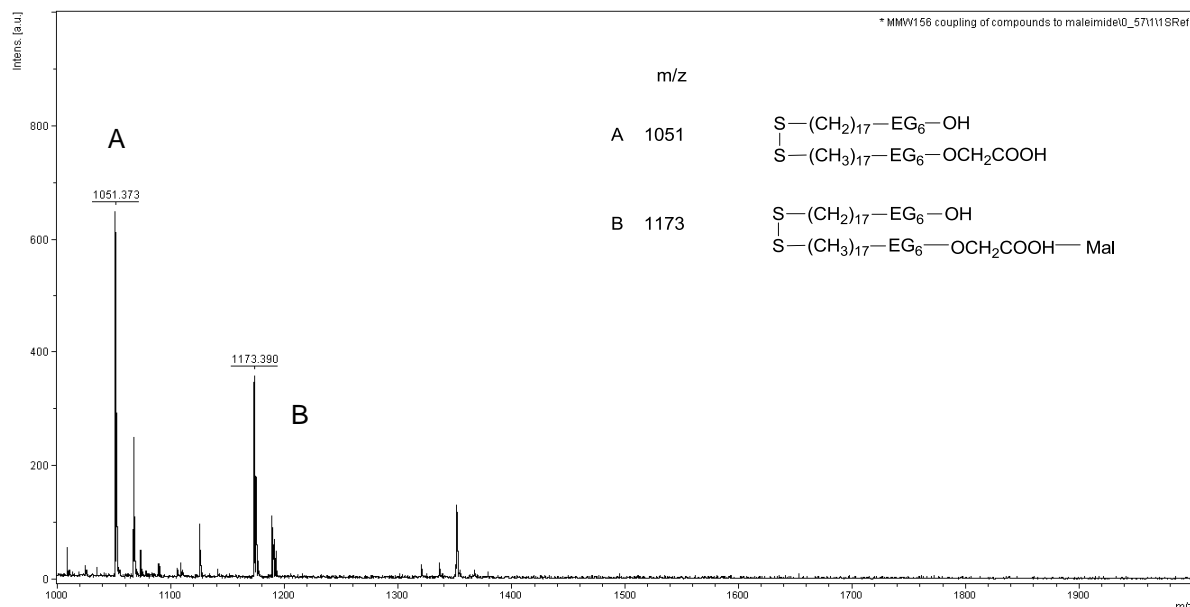

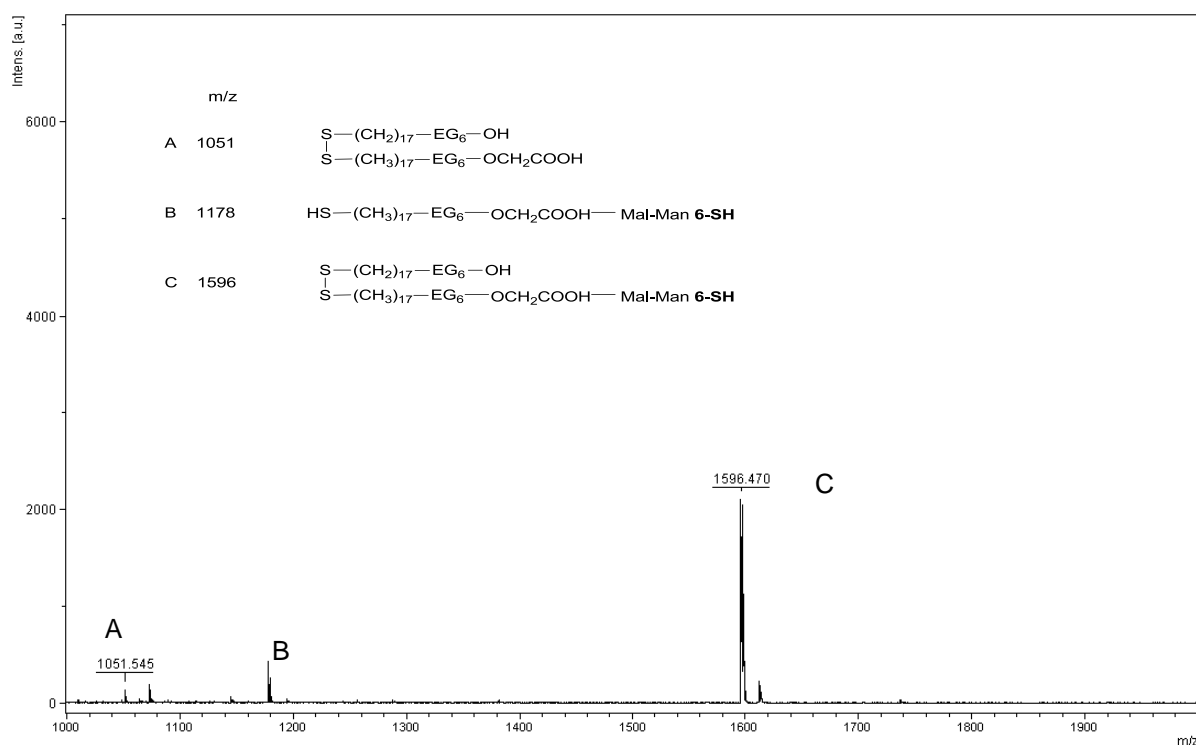

**Figure S24:** MALDI-ToF mass spectrum of gold surface modified with *N*-(2-aminoethyl)maleimide (Mal) (cf. Figure S21) after coupling of *in situ* deprotected thiol **6-SH**. Analysis of the formed SAM on gold showed: **A** the mixed disulphide formed *in situ* from the hydroxyl- and carboxyl-terminal thiols ( $m/z$  1051.545), **B** the thiol **6-SH** coupled to the maleimide ( $m/z$  1178) and **C** the mixed disulphide formed *in situ* from the hydroxyl-terminal linker and thiol **6-SH** coupled to the maleimide ( $m/z$  1596.470).

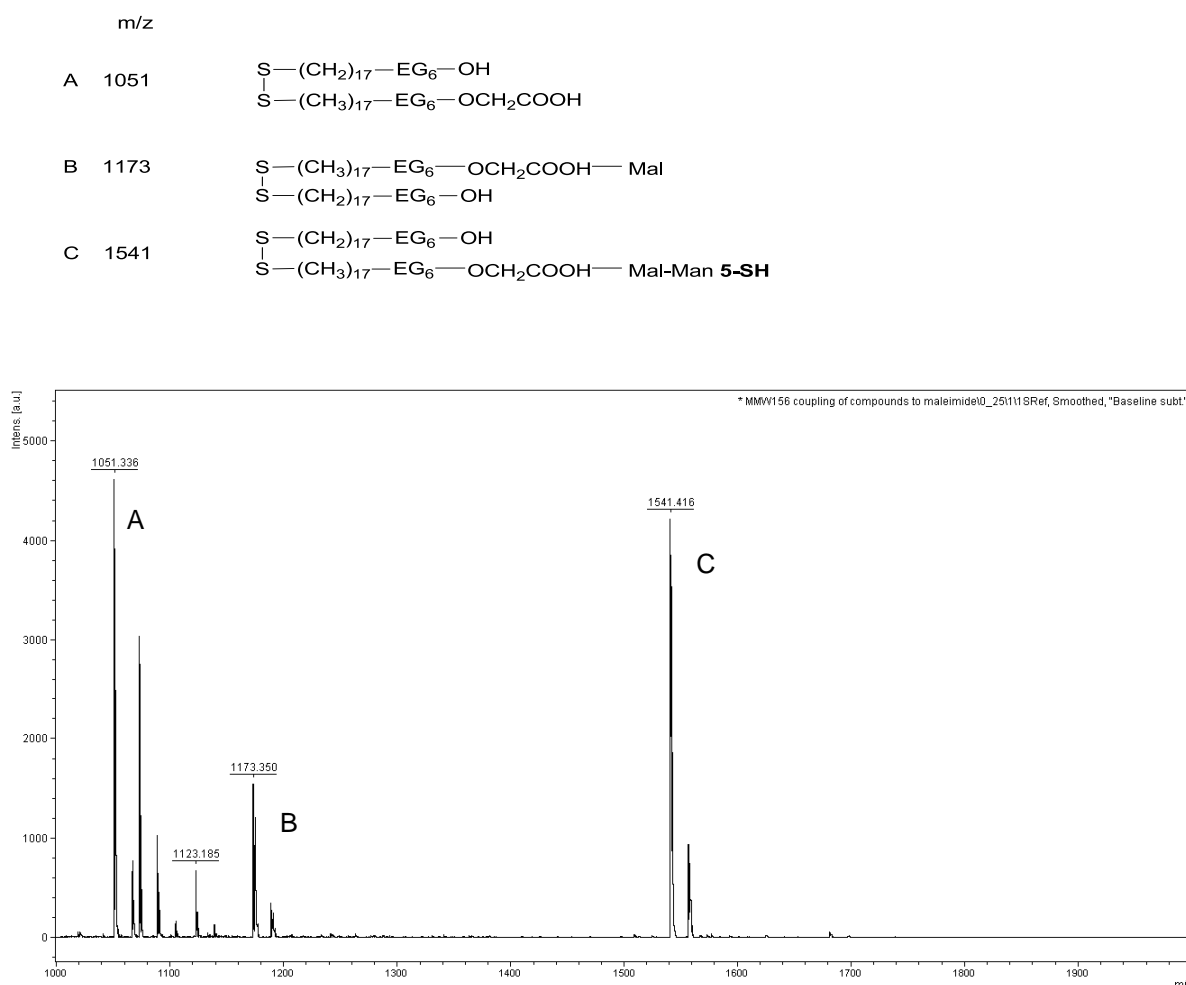

**Figure S25:** MALDI-ToF mass spectrum of gold surface modified with *N*-(2-aminoethyl)maleimide (Mal) (cf. Figure S21) after coupling of *in situ* deprotected thiol **5-SH**. Analysis of the formed SAM on gold showed: **A** the mixed disulphide formed *in situ* from the hydroxyl- and carboxyl-terminal thiols ( $m/z$  1051.336), **B** the mixed disulphide formed *in situ* from the maleimide and the hydroxyl-terminal molecules ( $m/z$  1173.350) and **C** the mixed disulphide formed *in situ* from the hydroxyl-terminal linker and thiol **5-SH** coupled to the maleimide ( $m/z$  1541.416).

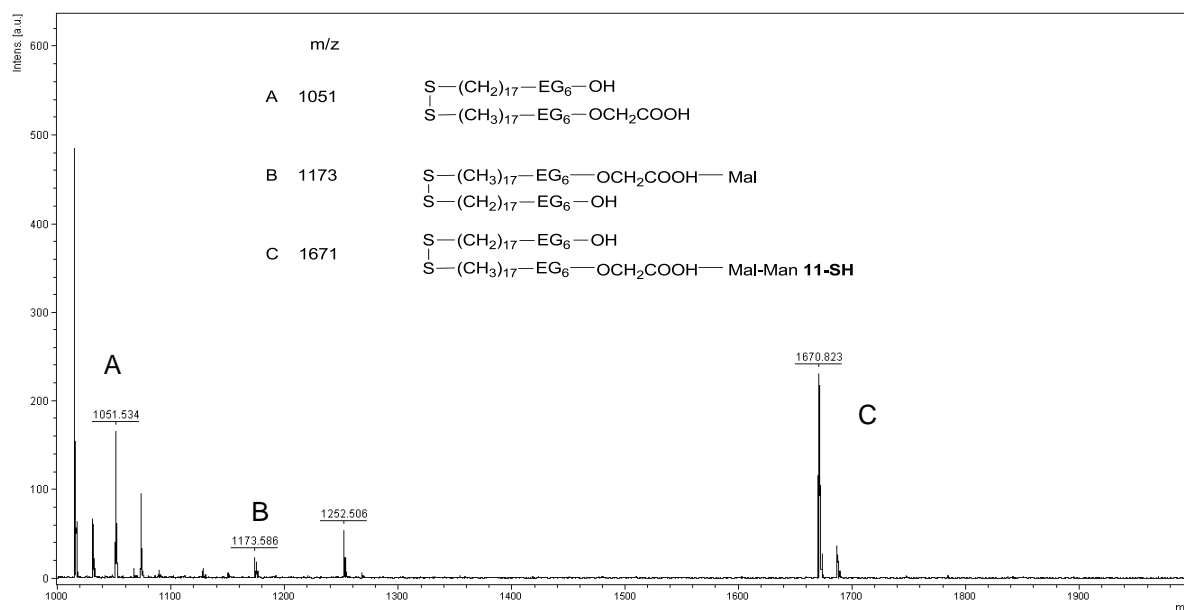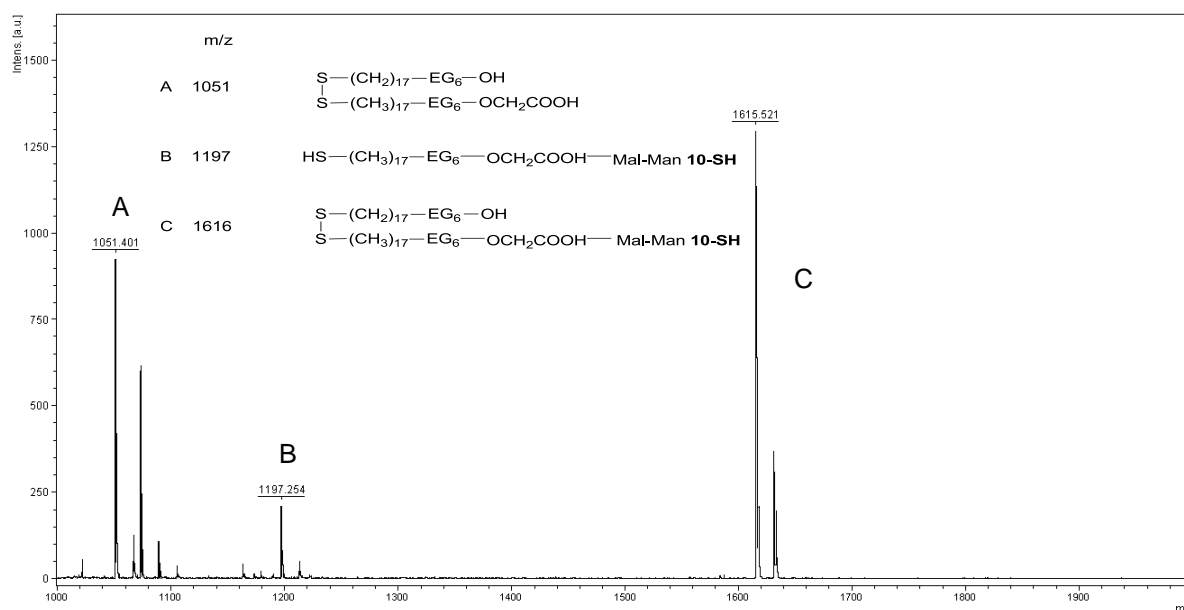

### 3 Glycoarrays on polystyrene

#### 3.1 Material, media and buffer solutions

*Microtiter plates (96 wells)* with a hydrophobic surface (Corning, no. 3631, 96 wells, flat clear bottom, black polystyrene, non-treated);

*Microtiter plates (384 wells)* with a hydrophobic surface (Corning, no. 3540, low volume, 384 wells, flat clear bottom, black polystyrene, non-treated);

*LB-medium (+AMP, +CAM) (PKL1162)*: tryptone (10.0 g), sodium chloride (10.0 g), and yeast extract (5.00 g) were dissolved in bidest. water (1.00 L, pH adjusted to 7.0); after sterilization (20 min 120°C) and cooling to 60°C, ampicillin (100 mg) and chloramphenicol (50.0 mg) were added;

*PBS buffer solution (pH 7.2)*: sodium chloride (8.00 g), potassium chloride (200 mg), sodium hydrogen phosphate-dihydrate (1.44 g), and potassium dihydrogen phosphate (200 mg) were dissolved in bidest. water (1.00 L);

*PBST buffer solution (pH 7.2)*: PBS buffer + 0.05 % v/v Tween® 20;

pH-Values were adjusted using 0.1 M HCl or 0.1 M NaOH, respectively.

#### 3.2 Blocking studies

Blocking agents are usually applied in microtiter plate assays to prevent unspecific binding to the hydrophobic polystyrene wells. Here, several blocking agents (BSA, gelatine and skimmed milk powder) were tested at different concentrations and incubation times. From all studies it could be seen that blocking had no influence on bacterial adhesion (Figure S28). Therefore, for all subsequent assays made in this study, no blocking agent was applied.

**Procedure:** Solutions of BSA (1%, 5%, 10%), gelatine (1%, 5%, 10%) and skimmed milk powder (1%, 5%, 10%) in PBS buffer (pH 7.2) were prepared. Each solution was pipetted into a 96 well hydrophobic microtiter plate (Corning, no. 3631, 150 µL/well) and incubated for 45 min and 2 h, respectively. Then, the plates were washed with PBST buffer (150 µL/well). *E. coli* (PKL1162, 1 mg/mL in PBS buffer) were pipetted into the wells (100 µL/well) and it was incubated for 45 min

and 2h (37°C, 120 rpm), respectively. After subsequent washing steps with PBS buffer (3 x 150 µL/well) and addition of PBS buffer (100 µL/well) fluorescence was read out.

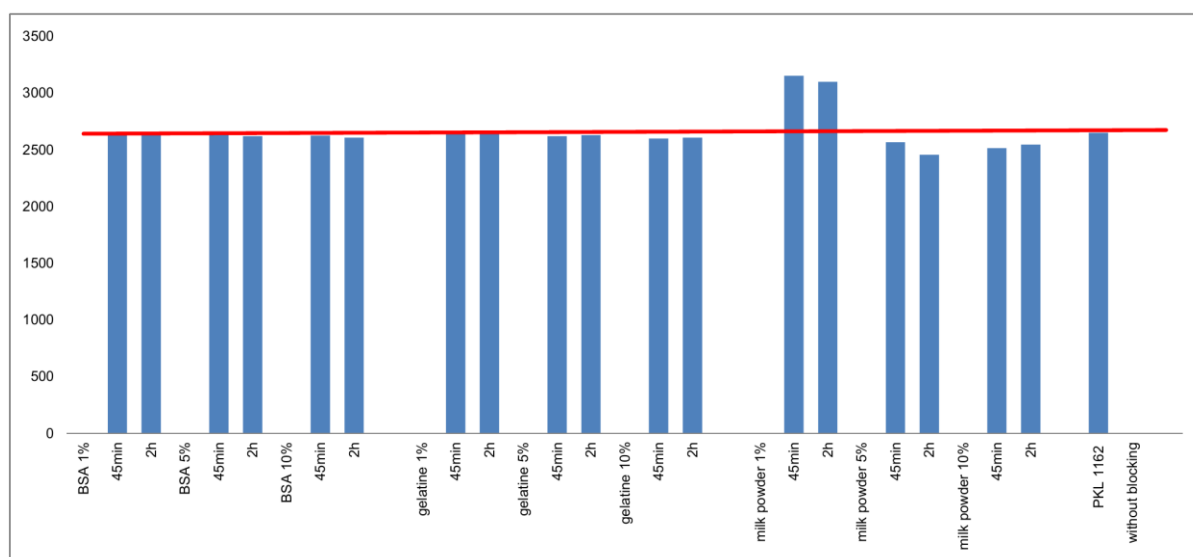

**Figure S28:** Blocking agents and incubation times were varied to test the importance of blocking in cellular adhesion (here: *E. coli* PKL1162 cells) to the hydrophobic polystyrene wells used. The red line indicates the blank value of unblocked plates incubated with *E. coli*. This testing proved that blocking is not required to suppress unspecific adhesion in this case.

### 3.3 Solvent studies

Three solvents and solvent mixtures, respectively, were tested for immobilisation of the *S*-tritylated mannoside **6** on hydrophobic 384 well microtiter plates. As shown in Figure S29, methanol proved to be the most suitable solvent for this purpose.

**Procedure:** Compound **6** was dissolved in MeOH, DMSO or DMSO/H<sub>2</sub>O (8:5) (25, 50, 100, and 200 mM), respectively. The solutions were added to a 384 well microtiter plate (Corning, no. 3540) (10 µL/well) at four different concentrations (cf. Figure S29) and incubated overnight at ambient temperature. Then remaining solvents were removed and it was washed with H<sub>2</sub>O bidest. (3 x 20 µL/well) and with PBST buffer (3 x 20 µL/well). *E. coli* suspension (PKL1162, 1 mg/mL in PBS buffer) was pipetted into the wells (10 µL/well) and it was incubated for 60 min (37°C, 120 rpm). After subsequent washing steps with PBS buffer (3 x 20 µL/well) and addition of PBS buffer (10 µL/well) fluorescence was read out.

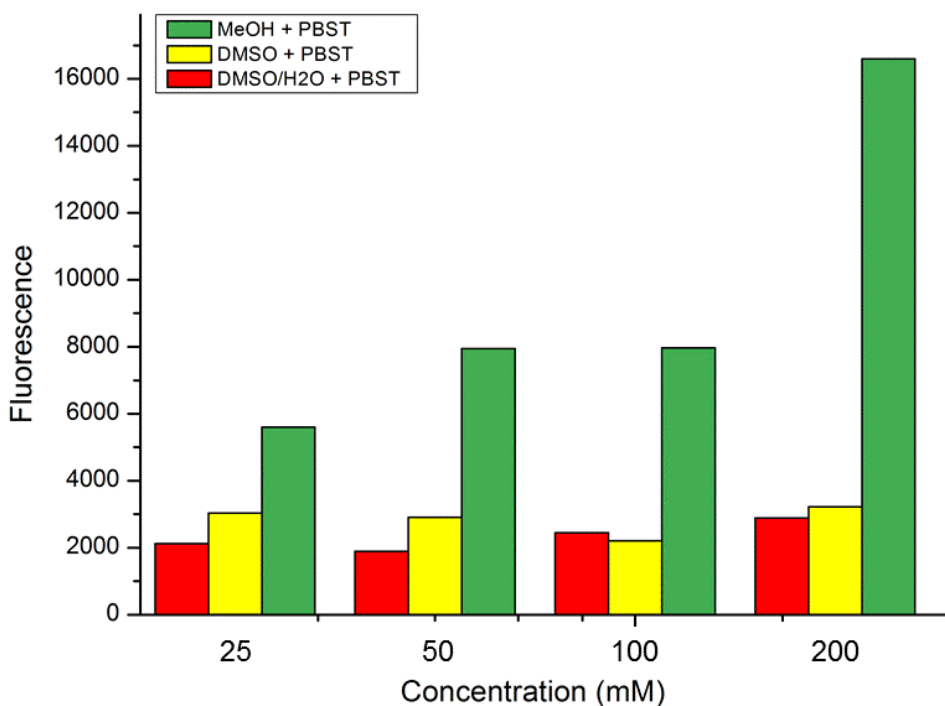

**Figure S29:** Three different solvents were used for immobilisation of the *S*-tritylated mannoside **6** at four different concentrations (25, 50, 100, and 200 mM). Fluorescent *E. coli* were allowed to adhere to the so formed surface and fluorescence was read out. Methanol was optimal at all tested concentrations.



### 3.4 Binding studies

Polystyrene surfaces were functionalised by non-covalent immobilisation of the polysaccharide mannan on one hand,<sup>[4]</sup> and on the other hand with the *S*-tritylated mannoside **6** and the *S*-tritylated non-glycosylated compound **3** as a control. Bacterial adhesion to these surfaces was tested using *E. coli* PKL1162. The results of this study are shown in Figure S30.

**Mannan coating:** 96 well microtiter plate (Corning, no. 3631) were filled with a solution of mannan from *Saccharomyces cerevisiae* (1.2 mg/mL in carbonate buffer, pH 9.5; 100 µL solution per well) and allowed to dry in at 37 °C overnight. The plates were washed with PBST (3 x 150 µL/well). Before use the wells were blocked with BSA (5 % in PBS, 120 µL/well) for 2 h at 37 °C and then washed with PBST (3 x 150 µL/well). (Assay was performed as described in chapter 3.3)

**Immobilisation of **3** and **6**:** Solutions of **3** and **6** (50 mM & 200 mM in MeOH) were added to a 96 well microtiter plate (35 µL/well) and incubated overnight at room temperature. Plates were washed with H<sub>2</sub>O (3 x 250 µL/well).

**BSA blocking:** A solution of BSA (3 %, 150 µL/well) was added to the respective wells, followed by incubation for 45 min (37°C, 120 rpm). (Blocking was not necessary when *S*-tritylated mannosides were employed.)

**Bacterial adhesion assay:** After washing the surface with PBST buffer (3 x 150 µL/well), *E. coli* suspension (PKL1162, 1 mg/mL in PBS buffer) was pipetted into the wells (100 µL/well) and it was incubated for 45 min (37°C, 120 rpm), followed by three washing steps with PBS buffer (150 µL/well). For fluorescence readout (485/535 nm), PBS buffer was added to the wells (100 µL/well).

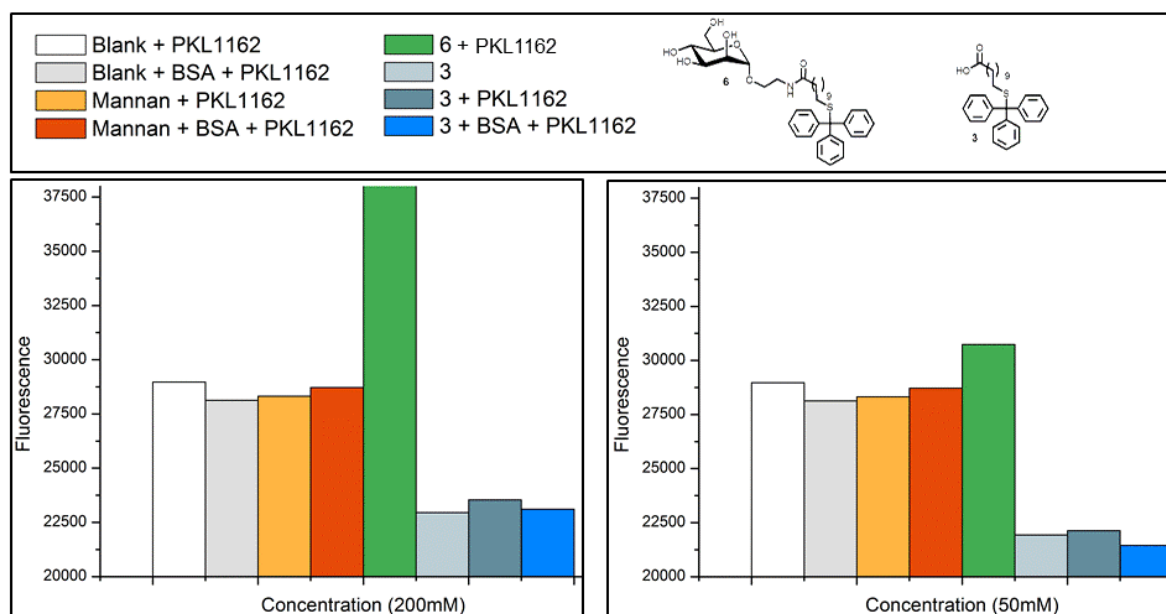

**Figure S30:** Fluorescence read out of bacterial adhesion (*E. coli* PKL1162) to variously treated polystyrene surfaces (hydrophobic microtitre plate). Blank: background signal, plain polystyrene, washed with H<sub>2</sub>O bidest. and PBST (3 x); mannan: mannan-coated surface; **3** and **6** were employed at two different concentrations (left: 200 mM; right: 50 mM of **3** and **6**).

Mannan-coated and uncoated (blank) surfaces show no significant difference in fluorescence intensity. This finding shows that mannan-coating is not suitable for testing mannose-specific bacterial adhesion on the employed hydrophobic polystyrene plates. Plates with immobilised mannoside **6**, on the other hand, gave a good fluorescence signal. Bacterial adhesion to the control surface with immobilised **3** led to decreased fluorescence signal. By that we could show that the adhesion of *E. coli* PKL1162 is carbohydrate-specific.

### 3.5 Comparison of bacterial adhesion to glycoarrays made with *S*-tritylated cysteinyl mannosides **5** and **10**

For concentration-dependent tests on bacterial adhesion, hydrophobic 384 well microtiter plates for increased throughput and decreased material usage were applied.

As expected, bacterial adhesion increases with increasing concentrations of mannoside solutions used for functionalisation of the polystyrene plate. However, when concentrations over 20 mM were employed, fluorescence signal was scattered (Figure S31). Thus, compounds **5** and **10** appeared less suited in this assay and were not used in further adhesion-inhibition studies with *E. coli* PKL1162.

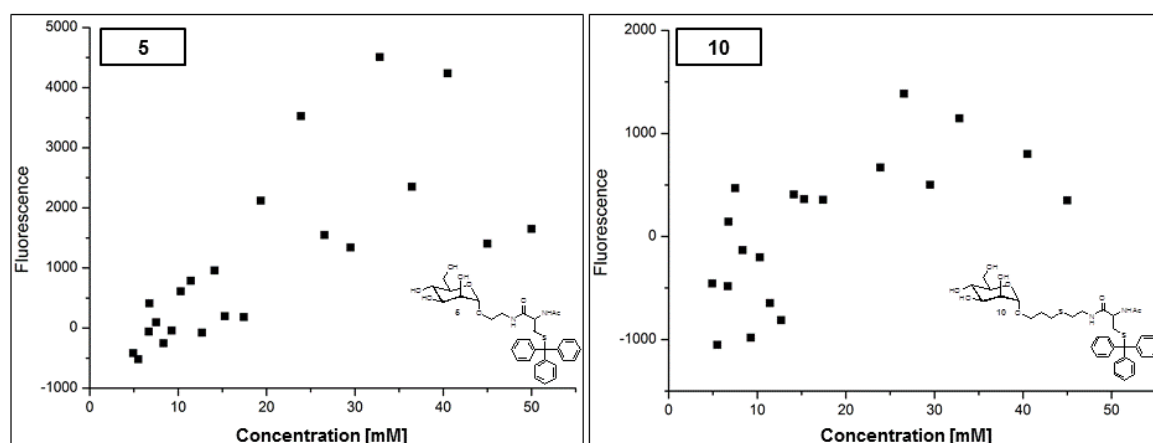

**Figure S31:** Results of bacterial adhesion (*E. coli* PKL1162) to glycoarrays obtained from differently concentrated solutions of *S*-tritylated mannosides **5** (left) and **10** (right) after 1 h incubation. Bacterial adhesion was measured by fluorescence read out.

### 3.6 Phenol-sulphuric acid assay

In order to determine the stability of glycoarrays formed from compounds **5**, **6**, **10** or **11** against different washing procedures a phenol-sulphuric acid assay was performed. Results are shown in Table S1.

**Table S1:** Quantification of non-covalently immobilised *S*-tritylated mannosides **5**, **6**, **10**, and **11** on polystyrene using phenol-sulphuric acid assay.\*

| Concentration of mannoside       | 50 mM<br>Glycoside quantity (%)** | 25 mM<br>Glycoside quantity (%)** | 12.5 mM<br>Glycoside quantity (%)** |
|----------------------------------|-----------------------------------|-----------------------------------|-------------------------------------|
| <i>Treatment of surface</i>      |                                   |                                   |                                     |
| <i>No Washing</i>                |                                   |                                   |                                     |
| <b>5</b>                         | 100                               | 100                               | 100                                 |
| <b>6</b>                         | 100                               | 100                               | 100                                 |
| <b>10</b>                        | 100                               | 100                               | 100                                 |
| <b>11</b>                        | 100                               | 100                               | 100                                 |
| <i>H<sub>2</sub>O</i>            |                                   |                                   |                                     |
| <b>5</b>                         | 85                                | 38                                | 15                                  |
| <b>6</b>                         | 100                               | 100                               | 100                                 |
| <b>10</b>                        | 100                               | 100                               | 100                                 |
| <b>11</b>                        | 87                                | 100                               | 58                                  |
| <i>H<sub>2</sub>O &amp; PBST</i> |                                   |                                   |                                     |
| <b>5</b>                         | 77                                | 39                                | 3                                   |
| <b>6</b>                         | 99                                | 80                                | 88                                  |
| <b>10</b>                        | 99                                | 89                                | 100                                 |
| <b>11</b>                        | 88                                | 100                               | 52                                  |
| <i>EtOH</i>                      |                                   |                                   |                                     |
| <b>5</b>                         | 0                                 | 0                                 | 0                                   |
| <b>6</b>                         | 0                                 | 0                                 | 0                                   |
| <b>10</b>                        | 0                                 | 0                                 | 0                                   |
| <b>11</b>                        | 0                                 | 0                                 | 0                                   |

\*Average values from triplicate results are given. \*\*The glycoside content without washing was defined as 100%. All measurements are based on this reference and given values are within an accuracy of +/- 6%. Washing with H<sub>2</sub>O and PBST was performed using 20 µL/well (3 x each); washing with ethanol was performed using 20 µL/well (6 x each).

## 4 References

- [1] A. Schierholt, M. Hartmann, K. Schwekendiek and T. K. Lindhorst, *Eur. J. Org. Chem.*, 2010, 3120-3128.
- [2] M. J. Weissenborn, J. W. Wehner, C. J. Gray, R. Šardžik, C. E. Eyers, T. K. Lindhorst and S. L. Flitsch, *Beilstein J. Org. Chem.*, 2012, **8**, 753-762.
- [3] J. W. Wehner and T. K. Lindhorst, *Synthesis*, 2010, 3070-3082.
- [4] S. Kötter, U. Krallmann-Wenzel, S. Ehlers and T. K. Lindhorst, *J. Chem. Soc. Perkin Trans. I*, 1998, 2193-2200.
